# Supplementary material for: Small Bait Traps May Not Accurately Reflect the Composition of Necrophagous Diptera Associated to Remains
Source: PubMed Central journal article supplement (PMC8003588; doi:10.3390/insects12030261), 2021-03-20
Supplement: insects-12-00261-s001.pdf [file insects-12-00261-s001.pdf]

a) July trial

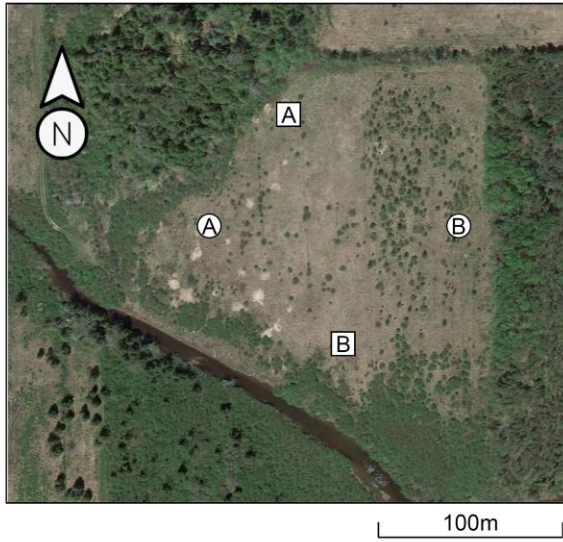

b) August trial

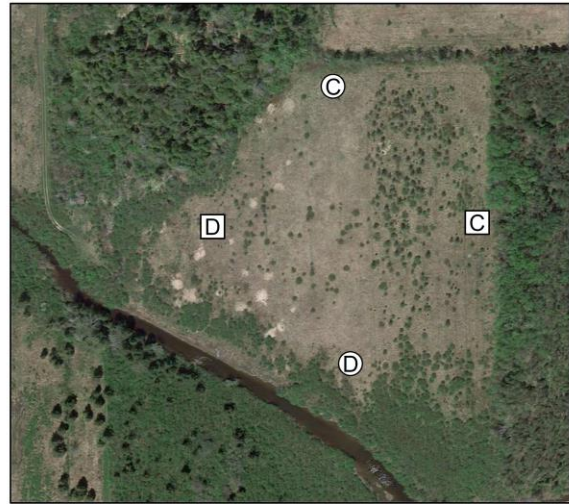

**Figure S1.** Map of the study site in Cocagne, New Brunswick, Canada, with location of pigs (squares) and small bait traps (circles) in the July and August trials.
